# Supplementary material for: Serotype-Specific IgG Antibody Waning after Pneumococcal Conjugate Primary Series Vaccinations with either the 10-Valent or the 13-Valent Vaccine
Source: Vaccines (Basel). 2018 Dec 11;6(4):82. doi: 10.3390/vaccines6040082 (PMC6313931; doi:10.3390/vaccines6040082)
Supplement: Supplementary file 1 [file vaccines-06-00082-s001.pdf]

Table S1: Baseline characteristics of study participants.

|                                  | <b>NTR2316</b> | <b>NTR3069</b> |               |
|----------------------------------|----------------|----------------|---------------|
|                                  | <b>PCV13</b>   | <b>PCV13</b>   | <b>PCV10</b>  |
|                                  | <b>(n=100)</b> | <b>(n=33)</b>  | <b>(n=66)</b> |
| Male sex, %                      | 55.0           | 60.6           | 50.0          |
| Date of birth, median (min-max)  | Aug 2010       | Sept 2011      | Nov 2011      |
|                                  | (May-Nov)      | (Sept-Sept)    | (Oct-Dec)     |
| Birth weight in grams, mean (SD) | 3631 (458)     | 3626 (496)     | 3636 (471)    |
| Age in months, mean (SD)         |                |                |               |
| At 2 months vaccination          | 1.9 (0.12)     | 1.9 (0.11)     | 2.0 (0.17)*   |
| At 3 months vaccination          | 2.9 (0.14)     | 2.9 (0.12)     | 3.2 (0.25)*   |
| At 4 months vaccination          | 3.9 (0.16)     | 3.9 (0.12)     | 4.3 (0.31)*   |
| At 5 months blood sampling       | 4.9 (0.18)     | -              | 5.3 (0.34)*   |
| At 8 months blood sampling       | 8.1 (0.13)     | -              | 8.1 (0.12)    |
| At 11 months blood sampling      | 11.5 (0.16)    | 11.3 (0.12)*   | 11.0 (0.27)*  |

\* p value < 0.05 of the PCV10 and PCV13 groups of NTR3069 both compared to their counterparts of the PCV13 group of trial NTR2316
